# Supplementary material for: The catalytic performance of metal complexes immobilized on SBA-15 in the ring opening polymerization of ε-caprolactone with different metals (Ti, Al, Zn and Mg) and immobilization procedures
Source: Royal Society of Chemistry journal article supplement (doi:10.1039/c4dt03385j), 2015-01-01
Supplement: c4dt03385j1.pdf [file c4dt03385j1.pdf]

## Supplementary Information

### **The catalytic performance of metal complexes immobilized on SBA-15 in the ring opening polymerization of $\epsilon$ -caprolactone with different metals (Ti, Al, Zn and Mg) and immobilization procedures**

Yolanda Pérez<sup>a\*</sup>, Isabel del Hierro<sup>a\*</sup>, Lydia Zazo<sup>a</sup>, Rafael Fernández-Galán<sup>b</sup>, Mariano Fajardo<sup>a</sup>

<sup>a</sup>Departamento Biología y Geología, Física y Química Inorgánica (E.S.C.E.T.), Universidad Rey Juan Carlos, 28933 Móstoles, Madrid, Spain. Tel.: (+34) 914887022  
Fax: (+34) 914888143

E-mail: [yolanda.cortes@urjc.es](mailto:yolanda.cortes@urjc.es), [isabel.hierro@urjc.es](mailto:isabel.hierro@urjc.es)

<sup>b</sup>Departamento Química Inorgánica, Orgánica y Bioquímica, Facultad de Ciencias y Tecnologías Químicas, Universidad de Castilla-La Mancha, Campus Universitario de Ciudad Real, 13071 Ciudad Real, Spain.

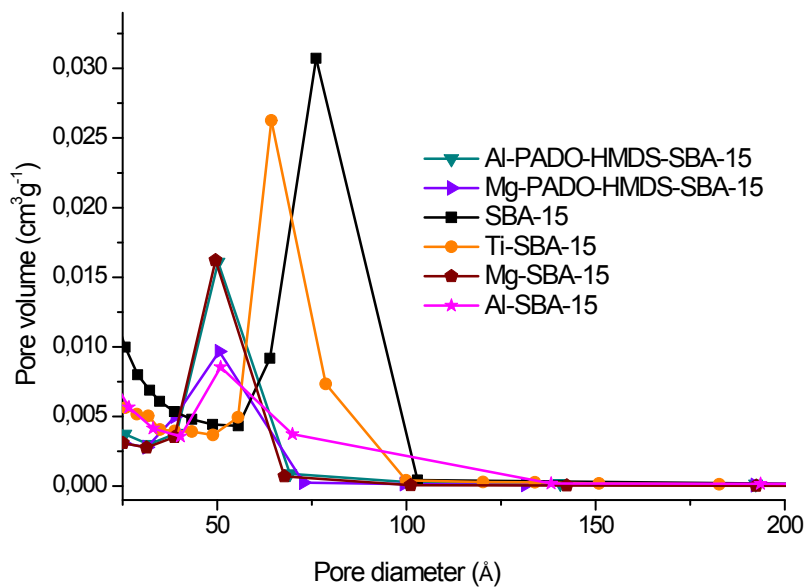

**Fig. S1.** Pore Size distribution of SBA-15 and hybrid materials determined by BJH method.

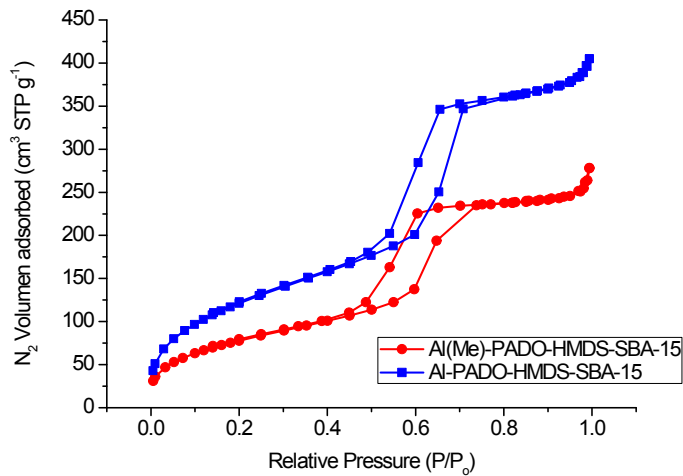

**Fig. S2.** Nitrogen adsorption-desorption isotherms profiles of Al-PADO-HMDS-SBA-15 and Al(Me)-PADO-HMDS-SBA-15

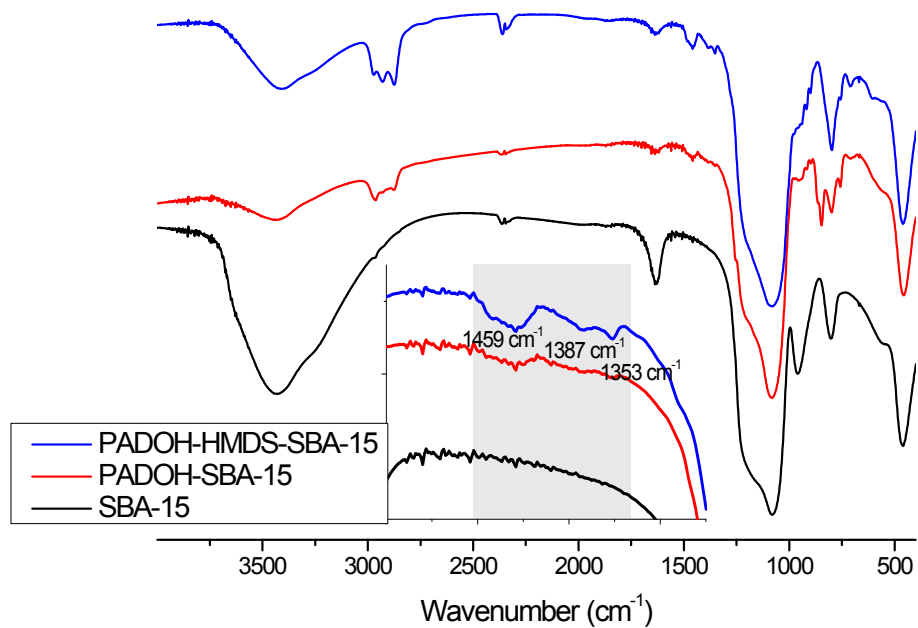

**Fig. S3.** FTIR spectra of SBA-15, PADOH-SBA-15 and PADOH-HMDS-SBA-15

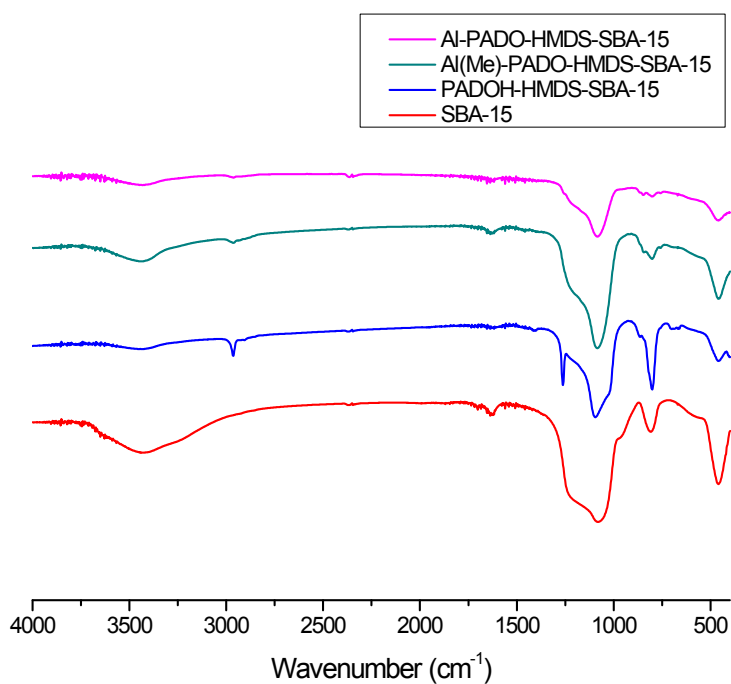

**Fig. S4.** FT-IR spectra of SBA-15, PADOH-HMDS-SBA-15; Al-PADO-HMDS-SBA-15 and Al(Me)-PADO-HMDS-SBA-15

## Synthesis and Characterization of homogeneous metal complexes

### *Synthesis of complex Ti-PADO*

Ti(O<sup>i</sup>Pr)<sub>4</sub> (0.95 mL, 3.19 mmol) was added to a CH<sub>2</sub>Cl<sub>2</sub> solution (25 mL) of 3-[Bis(2-hydroxyethyl)amino]propyl-triethoxysilane] 65% in ethanol (1.62 mL, 3.19 mmol). The resulting mixture was stirred at room temperature for 4 h. The solvent and the remaining isopropyl and ethyl alcohol were removed under vacuum. The resulting product was isolated as colourless oil after being rinsed twice with cold pentane. <sup>1</sup>H NMR (400 MHz, CDCl<sub>3</sub>) δ = 0.62 (t, 2H, Si-CH<sub>2</sub>-CH<sub>2</sub>-CH<sub>2</sub>-N); 1.12 (t, 9H, OCH<sub>2</sub>CH<sub>3</sub>); 1.17 (d, 12H, OCH(CH<sub>3</sub>)<sub>3</sub>); 1.60 (m, 2H, Si-CH<sub>2</sub>-CH<sub>2</sub>-CH<sub>2</sub>-N); 2.52 (t, 2H, Si-CH<sub>2</sub>-CH<sub>2</sub>-CH<sub>2</sub>-N); 3.63 (q, 6H, OCH<sub>2</sub>CH<sub>3</sub>); 4.34 (bs, 3H, OCH(CH<sub>3</sub>)<sub>3</sub>); 2.67 and 3.50-3.68 (m, 4H, N-((CH<sub>2</sub>)-OH)<sub>2</sub>). <sup>13</sup>C{H} NMR (400 MHz, C<sub>6</sub>D<sub>6</sub>) δ = 8.7 (Si-CH<sub>2</sub>-CH<sub>2</sub>-CH<sub>2</sub>-N); 21.8 (OCH<sub>2</sub>CH<sub>3</sub>); 18.9 (Si-CH<sub>2</sub>-CH<sub>2</sub>-CH<sub>2</sub>-N); 26.5 (OCH(CH<sub>3</sub>)<sub>3</sub>), 29.7 (Si-CH<sub>2</sub>-CH<sub>2</sub>-CH<sub>2</sub>-N); 51.6 (Si-CH<sub>2</sub>-CH<sub>2</sub>-CH<sub>2</sub>-N); 58.7 (OCH<sub>2</sub>CH<sub>3</sub>); 76.5 (OCH(CH<sub>3</sub>)<sub>3</sub>). FT-IR (KBr disk, cm<sup>-1</sup>) 710 (m), 801 (s), 935 (s), 955 (w), 1106 (s), 1281 (m), 1378 (m), 1464 (m), 2876 (m), 2924 (8m), 2972 (m).

### *Synthesis of complex Zn-PADO*

ZnMe<sub>2</sub> 2M in toluene (0.98 mL, 3.03 mmol) was added to a toluene solution (25 mL) of 3-[Bis(2-hydroxyethyl)amino]propyl-triethoxysilane] 65% in ethanol (1.00 mL, 3.03 mmol) at 0 °C. The reaction evolves with methane elimination as temperature increases to room temperature. The solution was stirred for 4 h, afterwards the solvent was removed in vacuo, and the resulting solid washed with hexane (2×10 mL) to give complex **Zn-PADO** as a white solid. Yield 88 %. <sup>1</sup>H NMR (400 MHz, CDCl<sub>3</sub>) δ = 0.66 (t, 2H, Si-CH<sub>2</sub>-CH<sub>2</sub>-CH<sub>2</sub>-N); 1.15 (t, 9H, OCH<sub>2</sub>CH<sub>3</sub>); 1.64 (m, 2H, Si-CH<sub>2</sub>-CH<sub>2</sub>-CH<sub>2</sub>-N); 2.55 (t, 2H, Si-CH<sub>2</sub>-CH<sub>2</sub>-CH<sub>2</sub>-N); 3.63 (q, 6H, OCH<sub>2</sub>CH<sub>3</sub>); 2.71 and 3.75-3.81 (m, 4H, N-((CH<sub>2</sub>)-OH)<sub>2</sub>). <sup>13</sup>C{H} NMR (400 MHz, C<sub>6</sub>D<sub>6</sub>) δ = 8.9 (Si-CH<sub>2</sub>-CH<sub>2</sub>-CH<sub>2</sub>-N); 21.1 (OCH<sub>2</sub>CH<sub>3</sub>); 18.9 (Si-CH<sub>2</sub>-CH<sub>2</sub>-CH<sub>2</sub>-N); 29.7 (Si-CH<sub>2</sub>-CH<sub>2</sub>-CH<sub>2</sub>-N); 51.2 (Si-CH<sub>2</sub>-CH<sub>2</sub>-CH<sub>2</sub>-N); 58.8 (OCH<sub>2</sub>CH<sub>3</sub>); 203.4 (N-((CH<sub>2</sub>)-O)<sub>2</sub>). FT-IR (KBr disk, cm<sup>-1</sup>) 710 (m), 796 (s), 935 (s), 1106 (s), 1266 (m), 1379 (m), 1464 (m), 2876 (m), 2924 (m), 2972 (m).

### *Synthesis of complex Al-PADO*

AlMe<sub>3</sub> 2M in toluene (1.05 mL, 2.1 mmol) or a toluene solution of Al(O<sup>i</sup>Pr)<sub>3</sub> (1.00 g, 4.9 mmol) was added to a toluene solution (25 mL) of 3-[Bis(2-hydroxyethyl)amino]propyl-triethoxysilane] 65% in ethanol stoichiometrically at 0 °C. The so obtained solutions were stirred for 4 h, afterwards the solvent and the by-products obtained were removed in vacuo, and the resulting solid washed with hexane (2×10 mL) to give complex **Al-PADO** as a white solid. Yield 95 and 88 %, respectively. <sup>1</sup>H NMR (400 MHz, CDCl<sub>3</sub>) δ = 0.63 (t, 2H, Si-CH<sub>2</sub>-CH<sub>2</sub>-CH<sub>2</sub>-N); 1.17 (t, 9H, OCH<sub>2</sub>CH<sub>3</sub>); 1.22 (bs, 3H, Al-OCH<sub>2</sub>CH<sub>3</sub>), 1.61 (m, 2H, Si-CH<sub>2</sub>-CH<sub>2</sub>-CH<sub>2</sub>-N); 2.54 (t, 2H, Si-CH<sub>2</sub>-CH<sub>2</sub>-CH<sub>2</sub>-N); 3.63 (q, 6H, OCH<sub>2</sub>CH<sub>3</sub>); 2.71 and 2.60-3.77 (m, 4H, N-((CH<sub>2</sub>)-OH)<sub>2</sub>). <sup>13</sup>C{H} NMR (400 MHz, C<sub>6</sub>D<sub>6</sub>) δ = 9.3 (Si-CH<sub>2</sub>-CH<sub>2</sub>-CH<sub>2</sub>-N); 21.4 (OCH<sub>2</sub>CH<sub>3</sub>); 19.3 (Si-CH<sub>2</sub>-CH<sub>2</sub>-CH<sub>2</sub>-N); 51.5 (Si-CH<sub>2</sub>-CH<sub>2</sub>-CH<sub>2</sub>-N); 52.4 (Si-CH<sub>2</sub>-

CH<sub>2</sub>-CH<sub>2</sub>-N); 52.6 (OCH<sub>2</sub>CH<sub>3</sub>); 199.34 (N-((CH<sub>2</sub>)-O)<sub>2</sub>). FT-IR (KBr disk, cm<sup>-1</sup>) 724 (s), 748 (m), 785 (s), 903 (s), 942 (s), 991 (m), 1103 (s), 1278 (m), 1383 (m), 1452 (m), 2870 (m), 2926 (m), 2970 (m).

### ***Synthesis of complex Mg-PADO***

Mg(<sup>n</sup>Bu)<sub>2</sub>, 1 M in heptane (3 mL, 3.03 mmol) or a toluene solution of Al(OPr<sup>i</sup>)<sub>3</sub> (1,00 g, 4,9 mmol) was added to a toluene solution (25 mL) of 3-[Bis(2-hydroxyethyl)amino]propyl-triethoxysilane] 65% in ethanol (1.00 mL, 3.03 mmol) at 0 °C. The reaction evolves with butane elimination as temperature increases to room temperature. The so obtained solutions were stirred for 4 h, afterwards the solvent and the by-products obtained were removed in vacuo, and the resulting solid washed with hexane (2×10 mL) to give complex **Mg-PADO** as a white solid. Yield 91 %. <sup>1</sup>H NMR (400 MHz, CDCl<sub>3</sub>) δ = 0.66 (t, 2H, Si-CH<sub>2</sub>-CH<sub>2</sub>-CH<sub>2</sub>-N); 1.16 (t, 9H, OCH<sub>2</sub>CH<sub>3</sub>); 1.20 (bs, 3H, Al-OCH<sub>2</sub>CH<sub>3</sub>), 1.64 (m, 2H, Si-CH<sub>2</sub>-CH<sub>2</sub>-CH<sub>2</sub>-N); 2.56 (t, 2H, Si-CH<sub>2</sub>-CH<sub>2</sub>-CH<sub>2</sub>-N); 3.67 (q, 6H, OCH<sub>2</sub>CH<sub>3</sub>); 2.73 and 2.56-3.80 (m, 4H, N-((CH<sub>2</sub>)-OH)<sub>2</sub>). <sup>13</sup>C{H} NMR (400 MHz, C<sub>6</sub>D<sub>6</sub>) δ = 9.8 (Si-CH<sub>2</sub>-CH<sub>2</sub>-CH<sub>2</sub>-N); 22.1 (OCH<sub>2</sub>CH<sub>3</sub>); 19.9 (Si-CH<sub>2</sub>-CH<sub>2</sub>-CH<sub>2</sub>-N); 54.3 (Si-CH<sub>2</sub>-CH<sub>2</sub>-CH<sub>2</sub>-N); 55.1 (Si-CH<sub>2</sub>-CH<sub>2</sub>-CH<sub>2</sub>-N); 53.8 (OCH<sub>2</sub>CH<sub>3</sub>); 201.6 (N-((CH<sub>2</sub>)-O)<sub>2</sub>). FT-IR (KBr disk, cm<sup>-1</sup>) 751 (m), 802 (s), 1022 (s), 1100 (s), 1263 (m), 1387 (m), 1460 (m), 2867 (m), 2923 (m), 2968 (m).

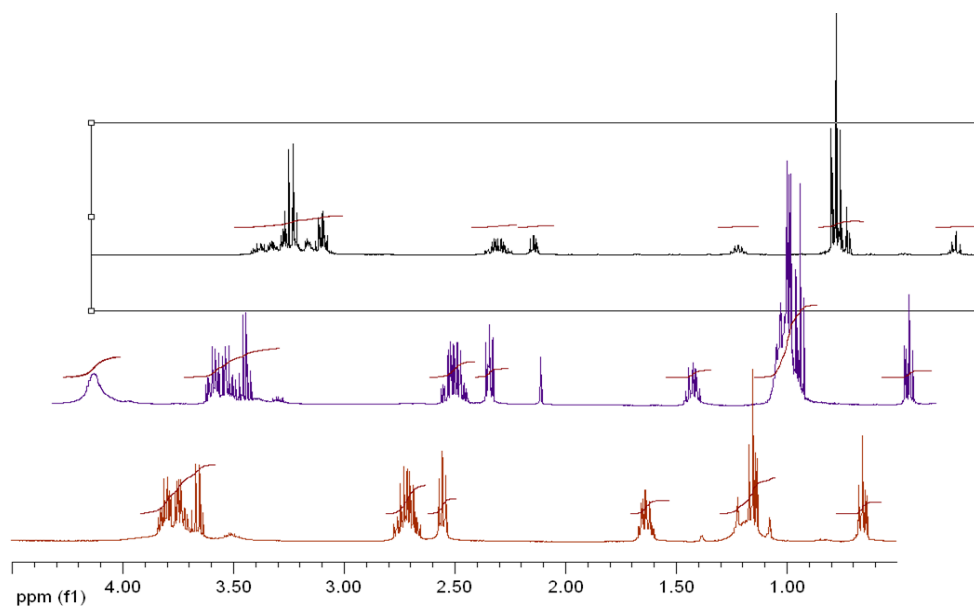

**Fig. S5.**  $^1\text{H}$  NMR spectra in  $\text{CDCl}_3$  (From up to down) of 3-[Bis(2-hydroxyethyl)amino]propyl-triethoxysilane] in EtOH, titanium and zinc complexes with the acronyms Ti-PADO and Zn-PADO, respectively.

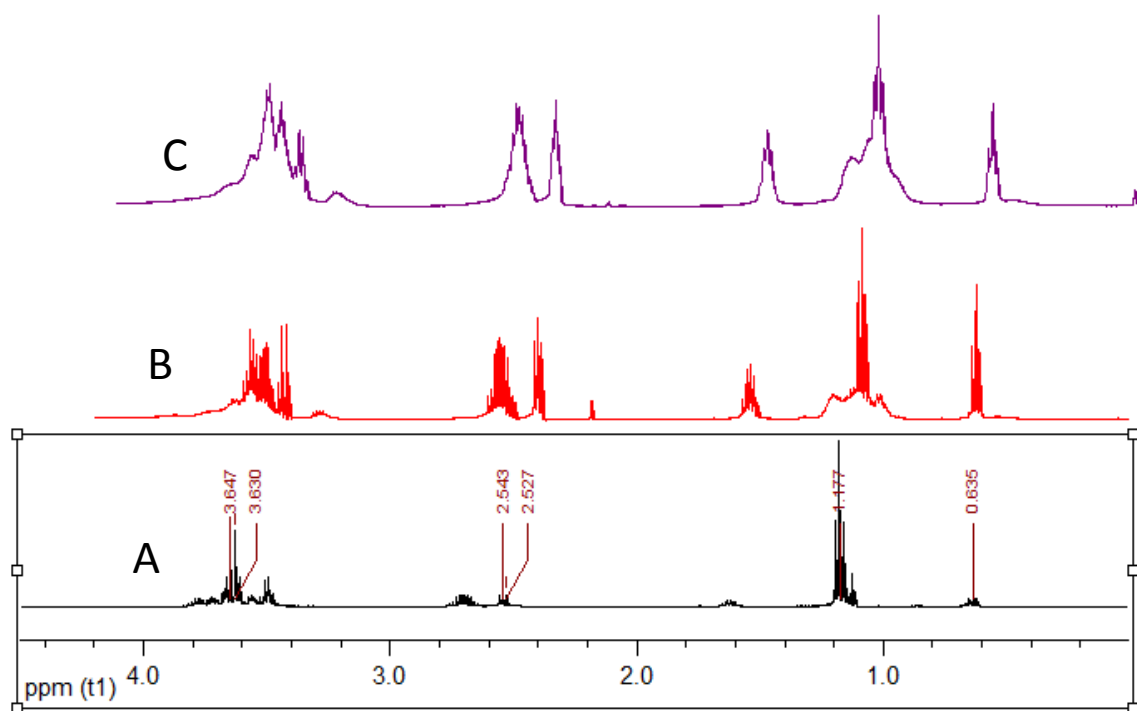

**Fig. S6.**  $^1\text{H}$  NMR spectra in  $\text{CDCl}_3$  (From down to up) of 3-[Bis(2-hydroxyethyl)amino]propyl-triethoxysilane] in EtOH, aluminum complex synthesized by reaction with  $\text{Al}(\text{O}^i\text{Pr})_3$  or  $\text{AlMe}_3$ , with the acronym Al-PADO.

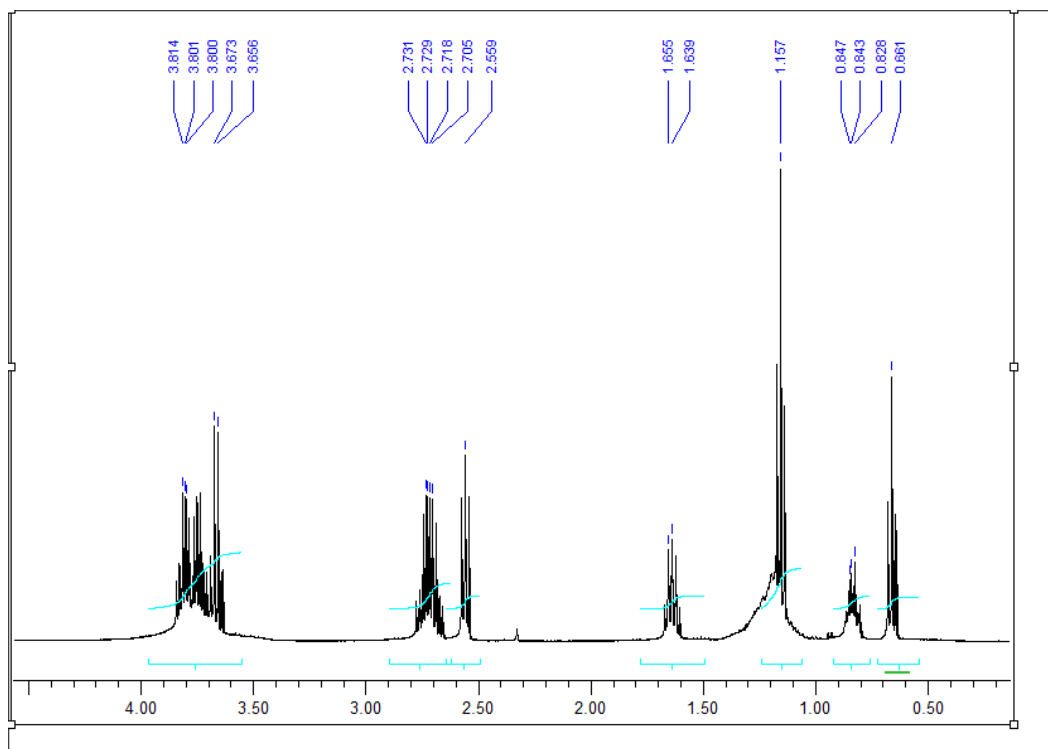

**Fig. S7.** <sup>1</sup>H NMR spectra in CDCl<sub>3</sub> of magnesium complex synthesized by reaction 3-[Bis(2-hydroxyethyl)amino]propyl-triethoxysilane] in EtOH with Mg(<sup>n</sup>Bu)<sub>2</sub>, with the acronym Mg-PADO.

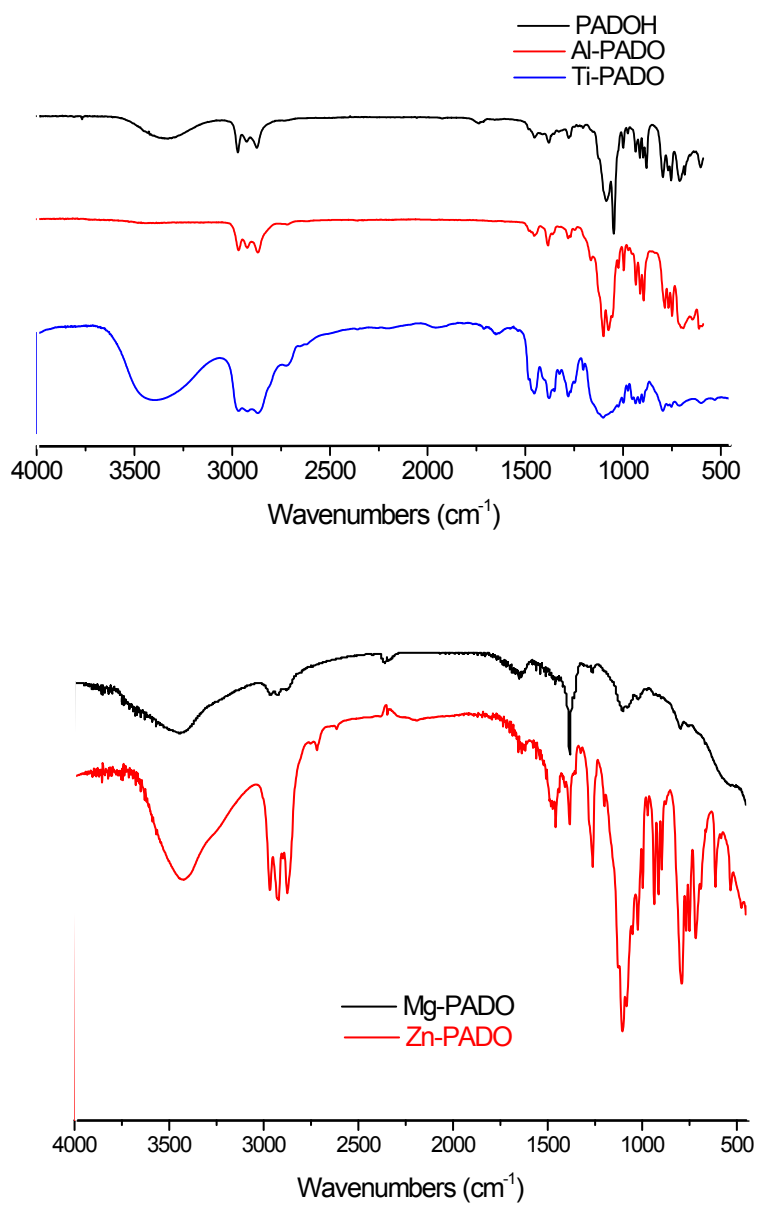

**Fig. S8.** FT-IR spectra of 3-[Bis(2-hydroxyethyl)amino]propyl-triethoxysilane (PADOH) in EtOH, Ti-PADO, Al-PADO, Mg-PADO and Zn-PADO



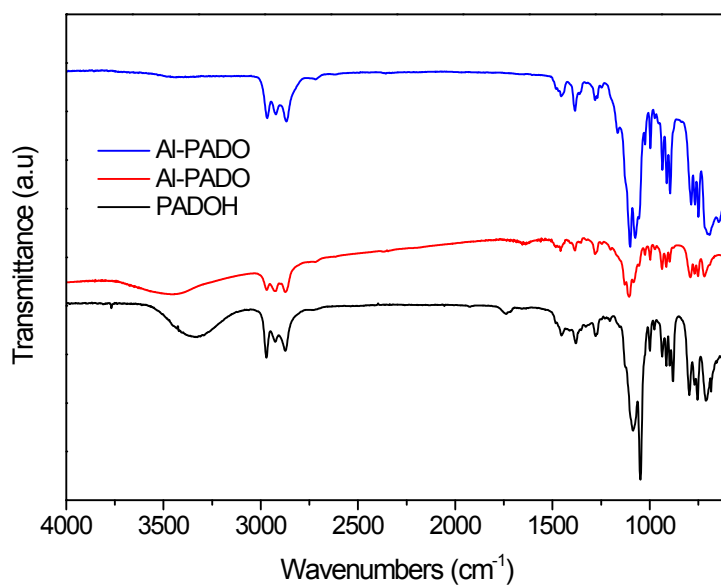

**Fig. S9.** FT-IR spectra of 3-[Bis(2-hydroxyethyl)amino]propyl-triethoxysilane (PADOH) in EtOH, aluminum complex synthesized by reaction with Al(O<sup>i</sup>Pr)<sub>3</sub> or AlMe<sub>3</sub>, with the acronym Al-PADO.

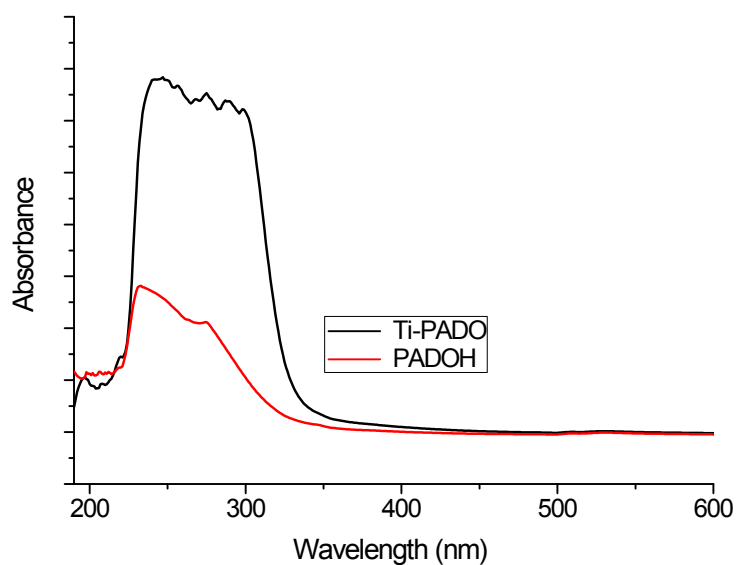

**Fig. S10.** UV-Vis spectra of 3-[Bis(2-hydroxyethyl)amino]propyl-triethoxysilane (PADOH) and Ti-PADO complex in CH<sub>2</sub>Cl<sub>2</sub>.

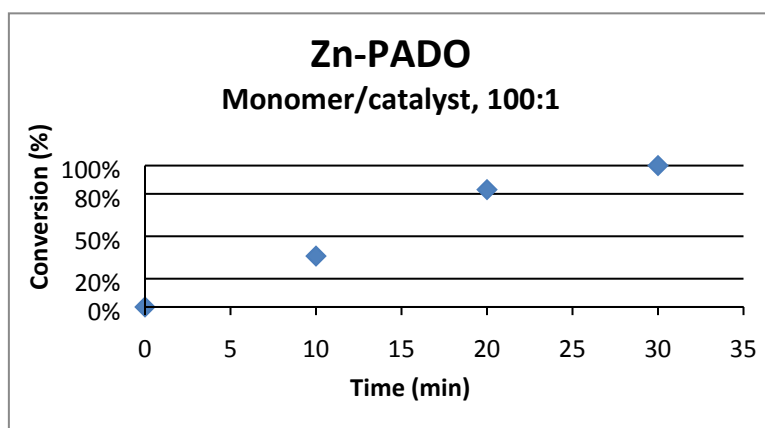

**Fig. S11.** Plot of conversion as a function of reaction time in  $\epsilon$ -caprolactone polymerization initiated with Zn-PADO complex, at room temperature, with  $(M_0/I_0) = 100$ .

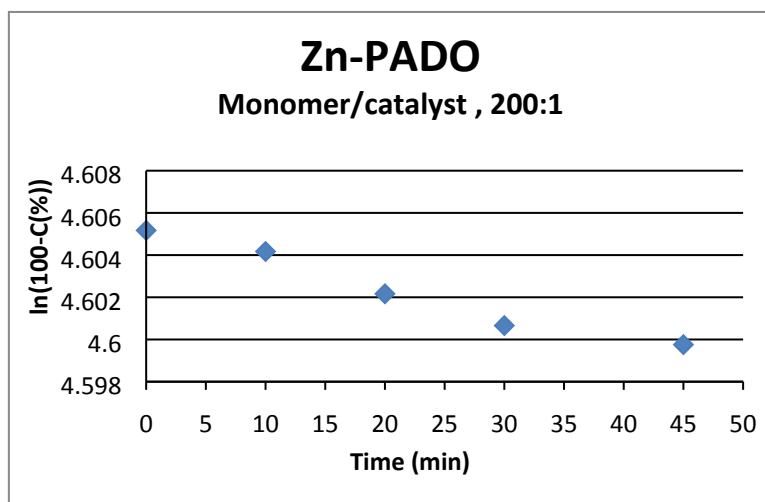

**Fig. S12.** Plot of  $\ln(100-C(\%))$  as a function of time in  $\epsilon$ -caprolactone polymerization initiated with Zn-PADO complexes at rt, with  $[M_0/I_0] = 200$ .  $C$  (%) corresponds to the degree of conversion in percent.

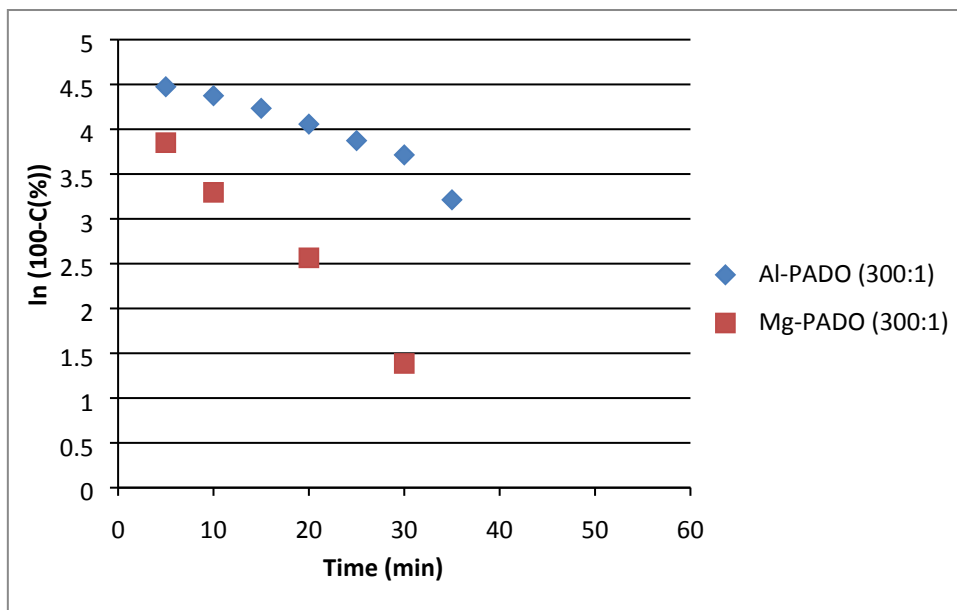

**Fig. S13.** Plot of  $\ln(100-C(\%))$  as a function of time in  $\epsilon$ -caprolactone polymerization initiated with Zn and Al-PADO complexes at rt, with  $[M_0/I_0] = 300$ .  $C$  (%) corresponds to the degree of conversion in percent.

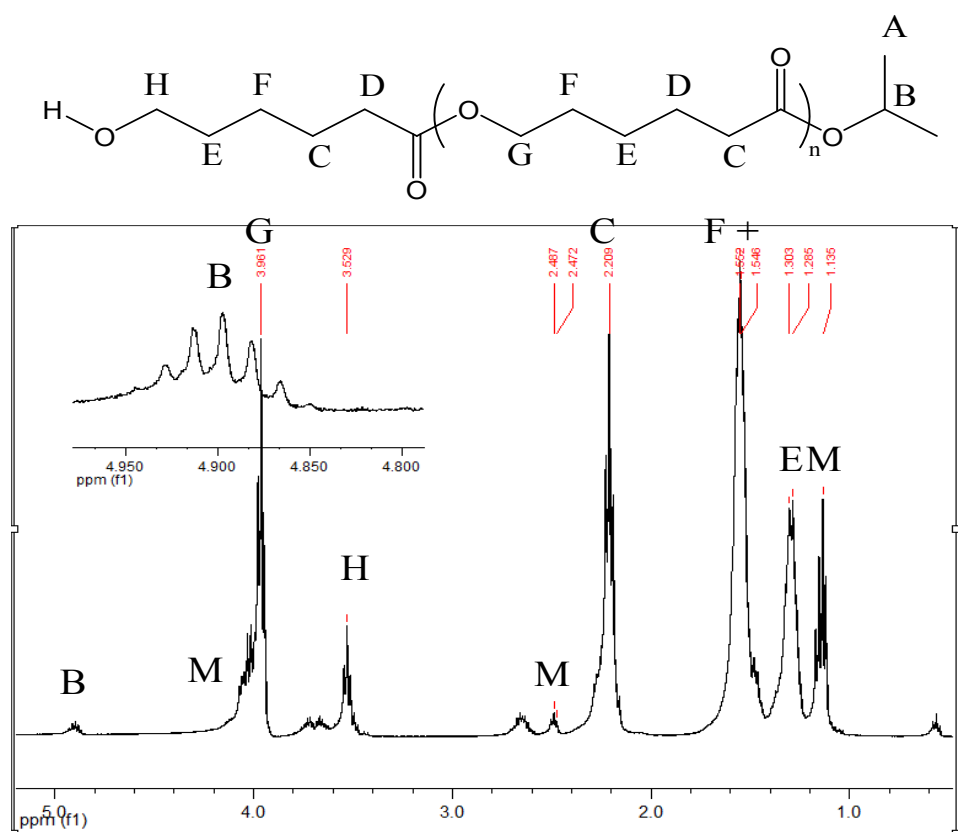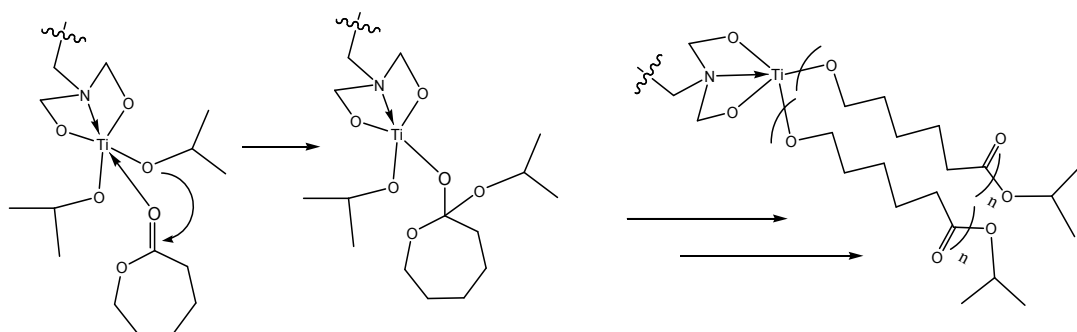

**Fig. S14.** <sup>1</sup>H NMR spectrum (measured in CDCl<sub>3</sub>, 400 MHz) of the polymer isolated from the polymerization of ε-caprolactone initiated with Ti-PADO, ( $M_0/I_0$ ) = 100, at rt by first dissolving initiator in dry CH<sub>2</sub>Cl<sub>2</sub> and stopping the reaction before complete polymerization. Proposed coordination-insertion mechanism.

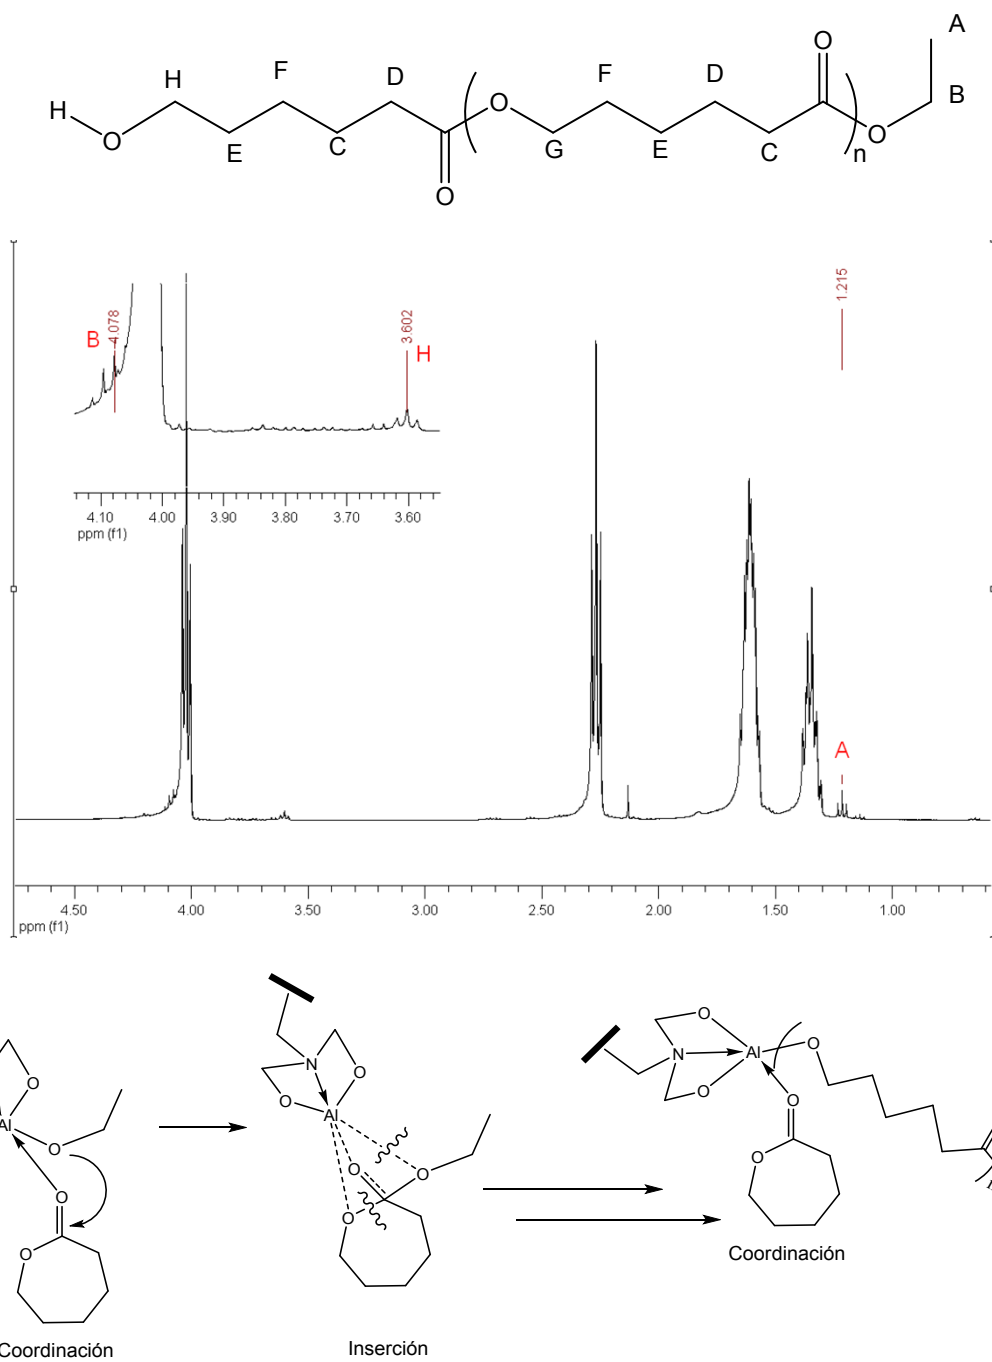

**Fig. S15.**  $^1\text{H}$  NMR spectrum (measured in  $\text{CDCl}_3$ , 400 MHz) of the polymer isolated from the polymerization of  $\epsilon$ -caprolactone initiated with Al-PADO ( $M_0/I_0$ ) 100) at rt by first dissolving initiator in dry  $\text{CH}_2\text{Cl}_2$  and stopping the reaction before complete polymerization. Proposed coordination insertion mechanism.

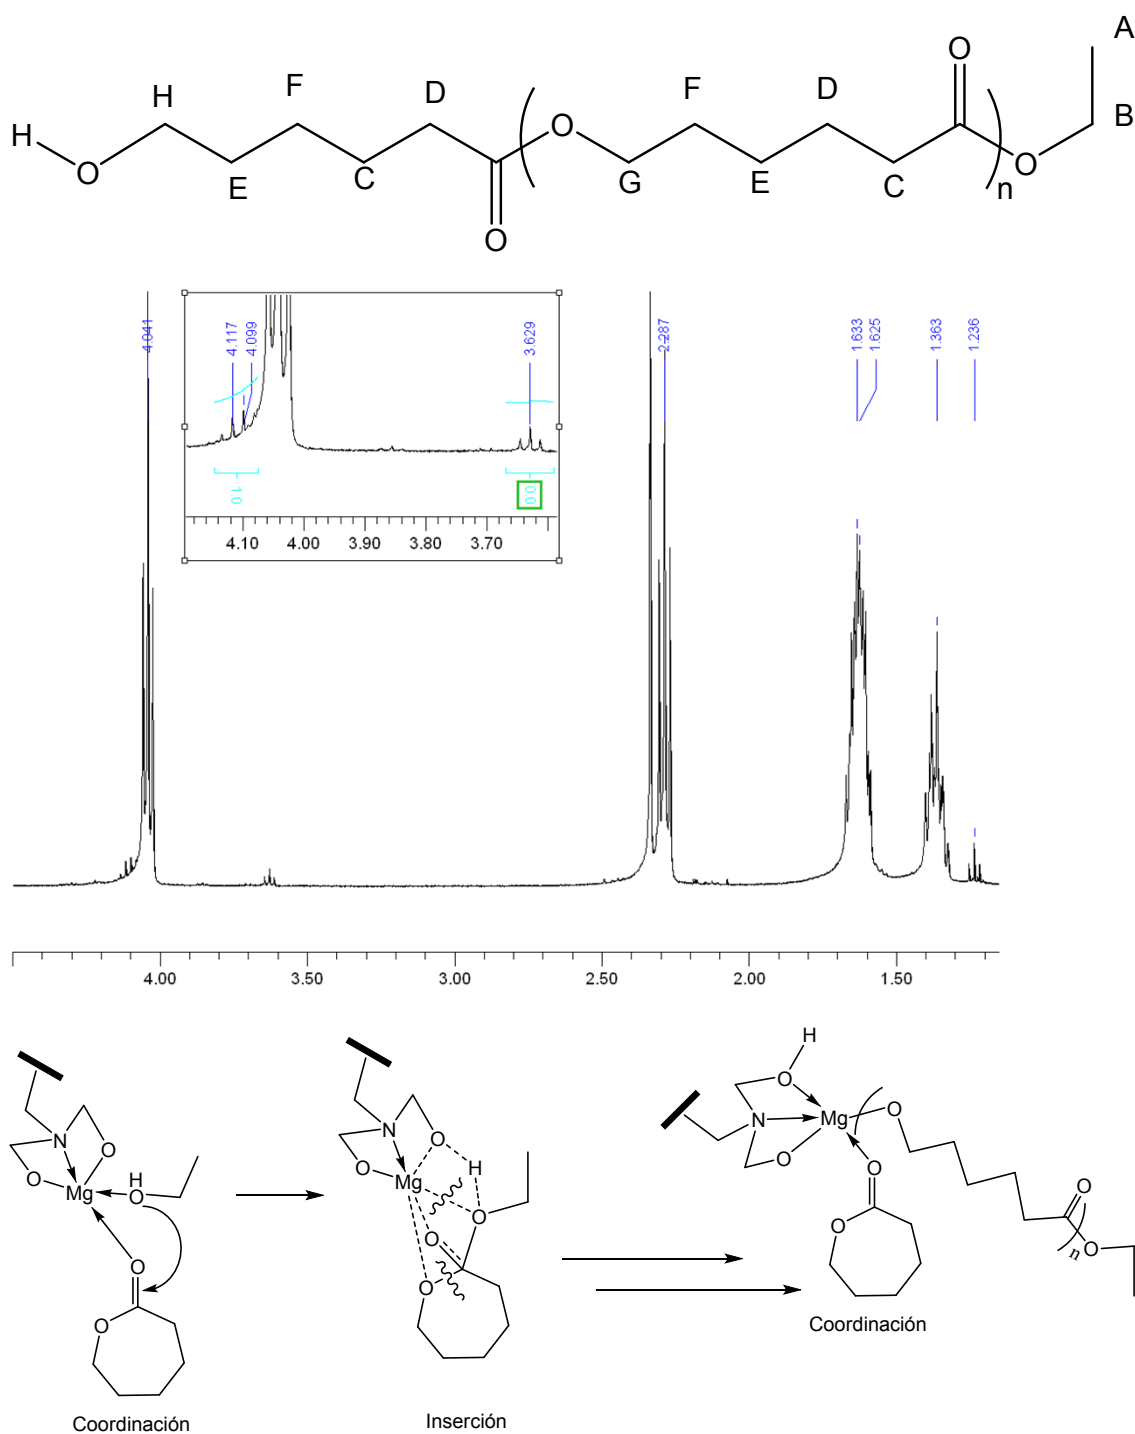

**Fig. S16.** <sup>1</sup>H NMR spectrum (measured in CDCl<sub>3</sub>, 400 MHz) of the polymer isolated from the polymerization of  $\epsilon$ -caprolactone initiated with Mg-PADO ( $M_0/I_0$ ) 100) at rt. Proposed coordination insertion mechanism.

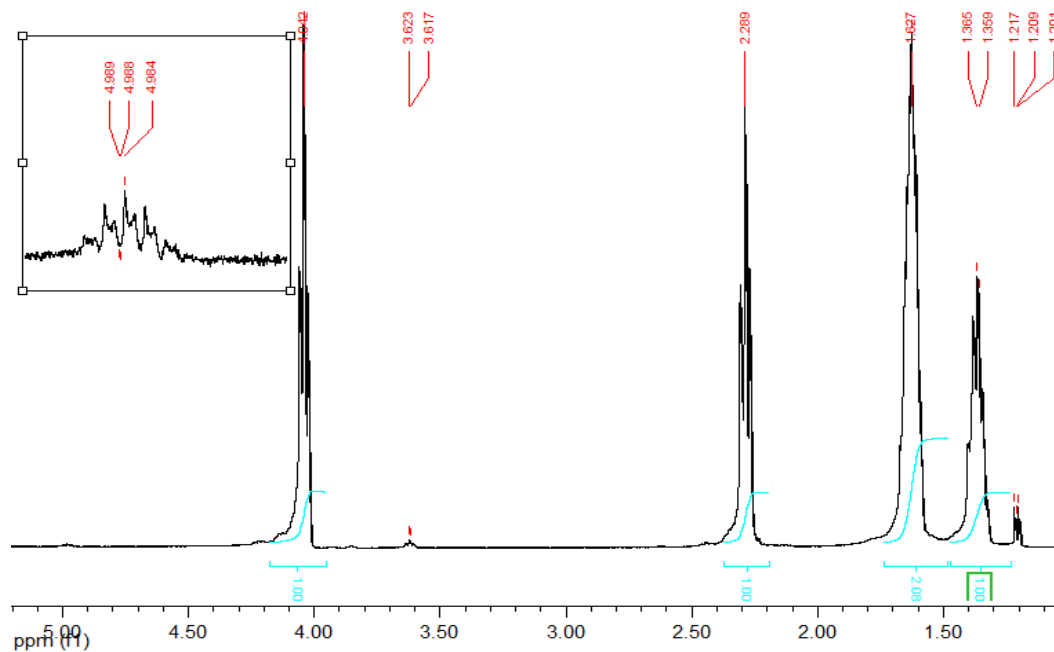

**Fig. S17.**  $^1\text{H}$  NMR spectrum (measured in  $\text{CDCl}_3$ , 400 MHz) of the polymer isolated from the polymerization of  $\epsilon$ -caprolactone initiated with Ti-SBA-15.

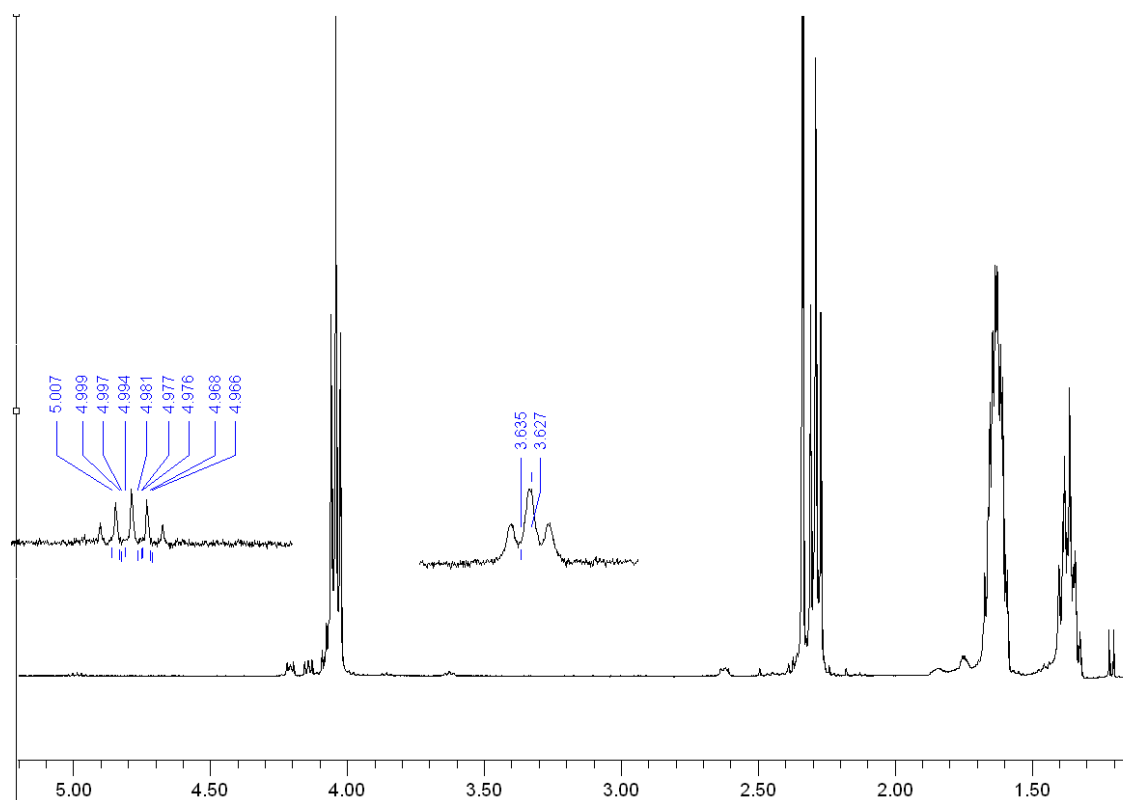

**Fig. S18.**  $^1\text{H}$  NMR spectrum (measured in  $\text{CDCl}_3$ , 400 MHz) of the polymer isolated from the polymerization of  $\epsilon$ -caprolactone initiated with Al-SBA-15.

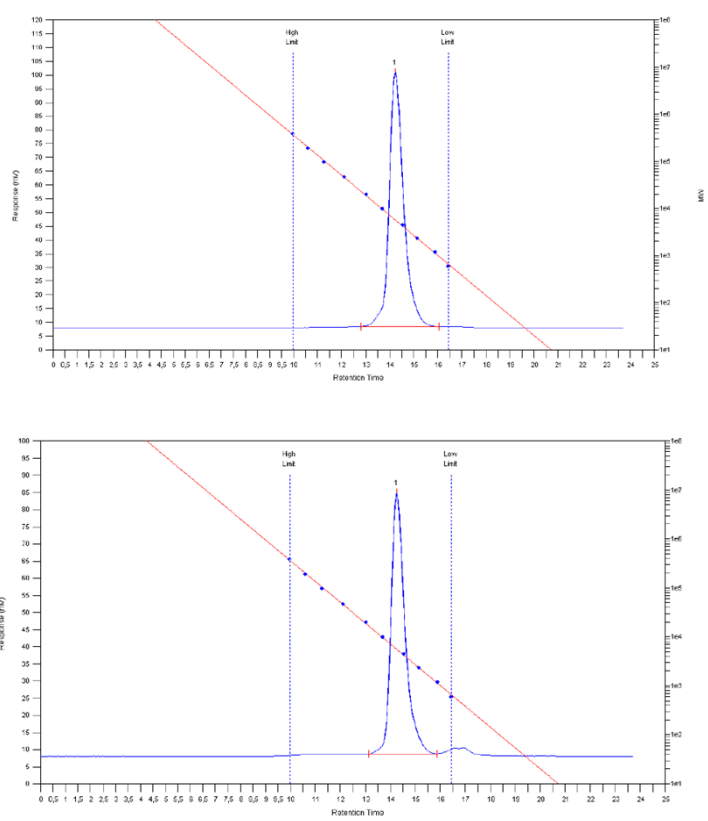

**Fig. S19.** Gel permeation chromatogram of PCL initiated by a) Zn-PADO-HMDS-SBA-15 and c) Zn-SBA-15.



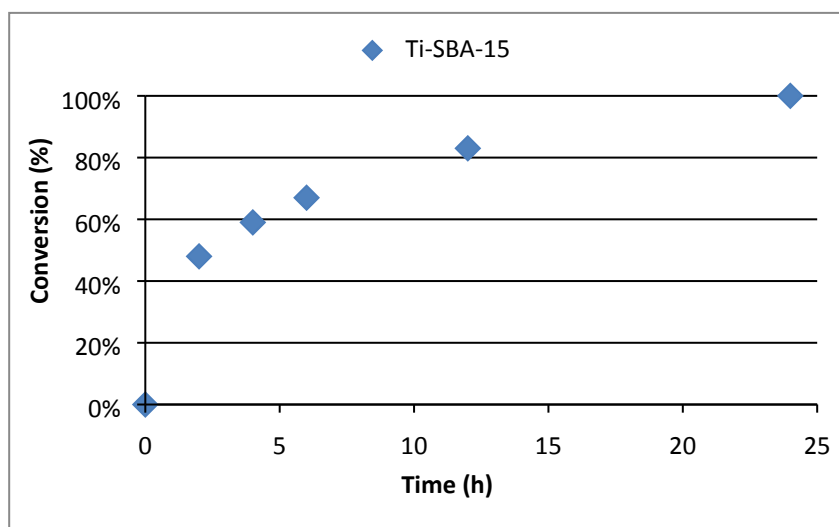

**Fig. S20.** Plot of conversion as a function of reaction time in  $\epsilon$ -caprolactone polymerization initiated with Ti-SBA-15 material, at 80°C, with  $(M_0/I_0) = 100$ .

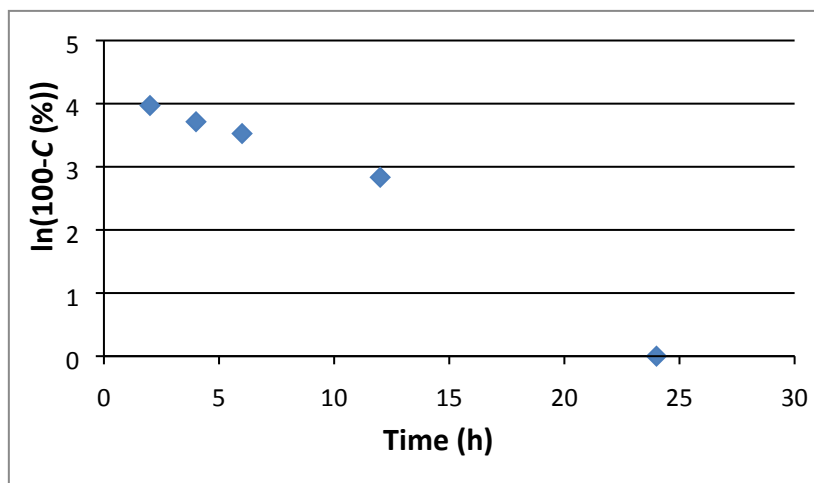

**Fig. S21.** Plot of  $\ln(100-C(\%))$  as a function of time in  $\epsilon$ -caprolactone polymerization initiated with Ti-SBA-15 material, at 80 °C, with  $(M_0/I_0) = 100$ .  $C$  (%) corresponds to the degree of conversion in percent.

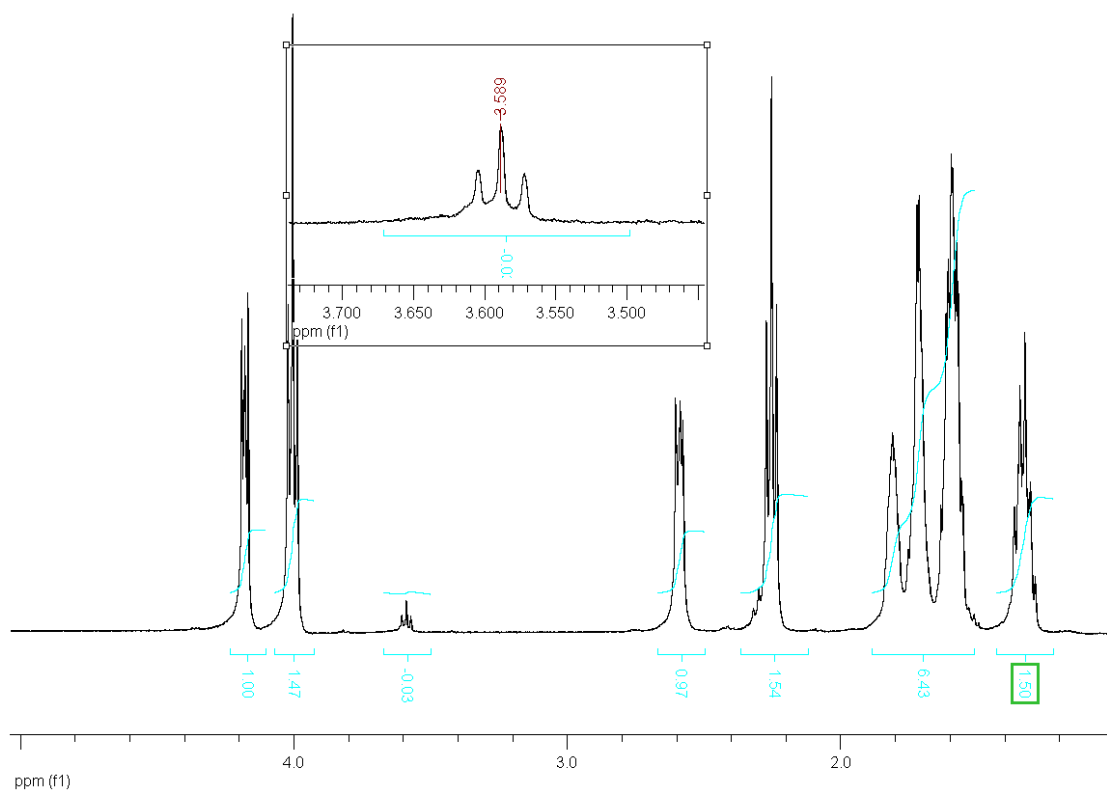

**Fig. S22.**  $^1\text{H}$  NMR spectrum (measured in  $\text{CDCl}_3$ , 400 MHz) of the polymer isolated from the polymerization of  $\epsilon$ -caprolactone initiated with Zn-PADO-HMDS-SBA-15.

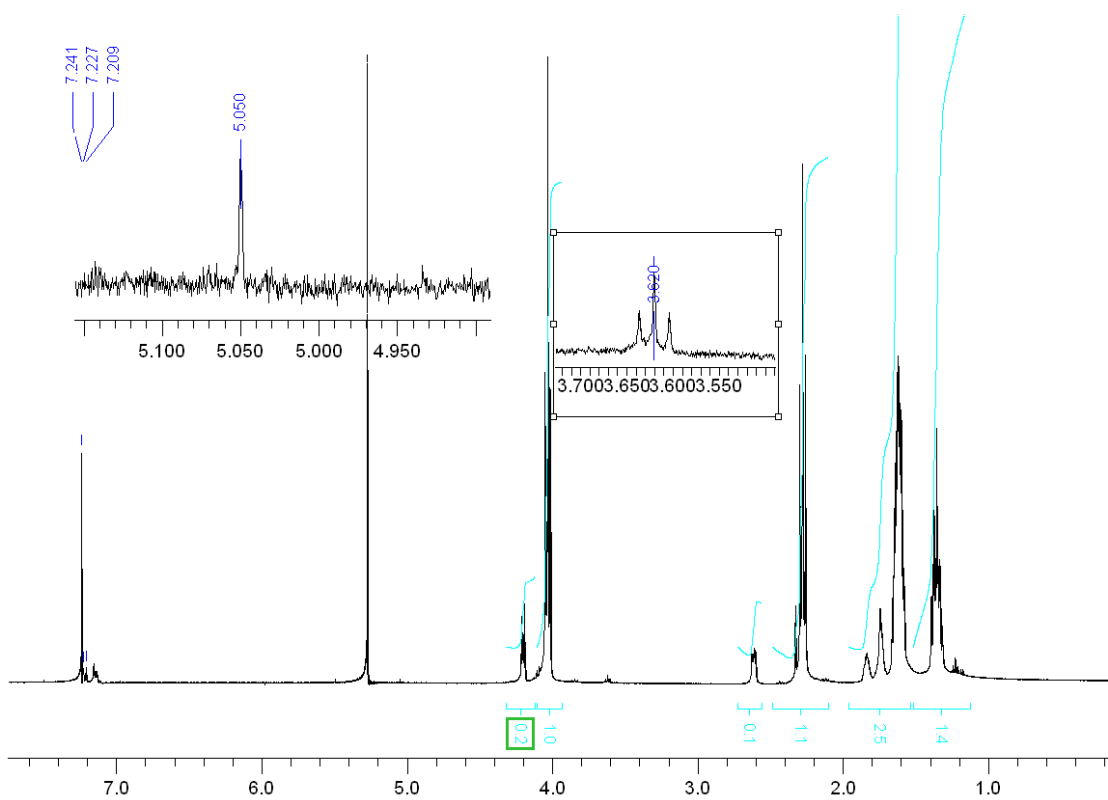

**Fig. S23.** <sup>1</sup>H NMR spectrum (measured in CDCl<sub>3</sub>, 400 MHz) of the polymer isolated from the polymerization of  $\epsilon$ -caprolactone initiated with Mg-PADO-HMDS-SBA-15 and benzylic alcohol.
